# Supplementary material
Source: publisher site journal article supplement (https://www.dovepress.com/get_supplementary_file.php?f=212321a.xlsx)
Supplement: Supplementary file 2 [file get_supplementary_file.php]

## Sheet: Table S1
	Table S1. Collection of IncpKF727591 and IncpKPHS1 plasmids and their repA and iteron sequences
	Plasmid type	Plasmid	Reference plasmid	Plasmid accession number	Host bacterium	repA sequence	Iteron-1	Iteron-2	Iteron-3	Iteron-4	IncpA1763-KPC repAsequence	Iterons
王淑杰剔除	IncFIIpKF727591α	pKF727591	IncFIIpKF727591α reference	KF727591	Enterobacter hormaechei	GTGGCTTCTCGCCGCCGCCGCCGGTTCCTGAACCGGTGGATCAAGTCACTTGCCACCCCTGCGGGCCGTCAGAAAATCAAAGCAGAACTGCGTCGCCGTATCCGGCACAACAGATACTGGGTTAACGAAGCCAACAAATTTGGGCTTGAGACACTTTGCGAGCTGATGCTGGCCATTCTCGACGATGTTGATTTACGAGACTGGCAGACCCGGCACAACCTTGAAACACTGGCTGAACGTGCAGGTCTGGCAACGCGCAGTGATGGCGGTCATAAGTCGATTTCTCGGGCTAGCCGGGGATGTGATCGCTTGTACTGGCTTAATGCCATCATCACAGACAAAGCCCCCTTCAATCCTTATGATGCCCGTTGCGCCTGTAAGCACATAGAGGTGACTGAG…	GACAAACATAAAAACAT	GAATAACTTAAAAACAT	CAAGCAGAGAACCACAT		ATGAATGAGAATGTTTATATCGGCGAGGTTATAGGTCCAGATTGTGAAAGTGTTAACAATAAACTCACCGTCACAAGTAAGGCCACAGTTCAGCCTGTAGCCCTGATGAGATTAAATGTTTTTGTTCCTTCAAGCAGGCCTGCAAAGGGCACCAGAACATCAATCGATGCGACCTCTGTTCTCAAGGATCTGGAATTCTCAAGGCGGGAGGGGTACGACGATATTCGTATAACCGGTGAACGGTTGAGTATGGCCATCGACTTCAAGGTATGGGTCGGTATCATAGAAGCTTTCAGTAAGTACGGTTTAAAAACCAACAGCATTAAGCTTACTTTTCATGAGTTTGCTGGAATGTGCCGCTTTGAGTCTAAGAGATTCGATTCCCGTCTTAGAAAAAGT…	ATTAAGTTGTTAAGTTAACAACTTAATATTGCCAAACAGGCGACAATATTGCAATGCCTTTATTAAGTTAATATCTTGTTAAGTTGTTAACCACATGATTTATAACTGAATT
王淑杰剔除		pKpn235-BG		KT852336	Klebsiella pneumoniae	GTGGCTTCTCGCCGCCGCCGCCGGTTCCTGAACCGGTGGATCAAGTCACTTGCCACCCCTGCGGGCCGTCAGAAAATCAAAGCAGAACTGCGTCGCCGTATCCGGCACAACAGATACTGGGTTAACGAAGCCAACAAATTTGGGCTTGAGACACTTTGCGAGCTGATGCTGGCCATTCTCGACGATGTTGATTTACGAGACTGGCAGACCCGGCACAACCTTGAAACACTGGCTGAACGTGCAGGTCTGGCAACGCGCAGTGATGGCGGTCATAAGTCGATTTCTCGGGCTAGCCGGGGATGTGATCGCTTGTACTGGCTTAATGCCATCATCACAGACAAAGCCCCCTTCAATCCTTATGATGCCCGTTGCGCCTGTAAGCACATAGAGGTGACTGAG…	GACAAACATAAAAACAT	GAATAACTTAAAAACAT	CAAGCAGAGAACCACAT
纳入分析		pKpn240-BG		KT852335	Klebsiella pneumoniae	GTGGCTTCTCGCCGCCGCCGCCGGTTCCTGAACCGGTGGATCAAGTCACTTGCCACCCCTGCGGGCCGTCAGAAAATCAAAGCAGAACTGCGTCGCCGTATCCGGCACAACAGATACTGGGTTAACGAAGCCAACAAATTTGGGCTTGAGACACTTTGCGAGCTGATGCTGGCCATTCTCGACGATGTTGATTTACGAGACTGGCAGACCCGGCACAACCTTGAAACACTGGCTGAACGTGCAGGTCTGGCAACGCGCAGTGATGGCGGTCATAAGTCGATTTCTCGGGCTAGCCGGGGATGTGATCGCTTGTACTGGCTTAATGCCATCATCACAGACAAAGCCCCCTTCAATCCTTATGATGCCCGTTGCGCCTGTAAGCACATAGAGGTGACTGAG…	GACAAACATAAAAACAT	GAATAACTTAAAAACAT	CAAGCAGAGAACCACAT
纳入分析		pB-3002cz		KJ958926	Klebsiella pneumoniae	GTGGCTTCTCGCCGCCGCCGCCGGTTCCTGAACCGGTGGATCAAGTCACTTGCCACCCCTGCGGGCCGTCAGAAAATCAAAGCAGAACTGCGTCGCCGTATCCGGCACAACAGATACTGGGTTAACGAAGCCAACAAATTTGGGCTTGAGACACTTTGCGAGCTGATGCTGGCCATTCTCGACGATGTTGATTTACGAGACTGGCAGACCCGGCACAACCTTGAAACACTGGCTGAACGTGCAGGTCTGGCAACGCGCAGTGATGGCGGTCATAAGTCGATTTCTCGGGCTAGCCGGGGATGTGATCGCTTGTACTGGCTTAATGCCATCATCACAGACAAAGCCCCCTTCAATCCTTATGATGCCCGTTGCGCCTGTAAGCACATAGAGGTGACTGAG…	GACAAACATAAAAACAT	GAATAACTTAAAAACAT	CAAGCAGAGAACCACAT		ATGAATGAGAATGTTTATATCGGCGAGGTTATAGGTCCAGATTGTGAAAGTGTTAACAATAAACTCACCGTCACAAGTAAGGCCACAGTTCAGCCTGTAGCCCTGATGAGATTAAATGTTTTTGTTCCTTCAAGCAGGCCTGCAAAGGGCACCAGAACATCAATCGATGCGACCTCTGTTCTCAAGGATCTGGAATTCTCAAGGCGGGAGGGGTACGACGATATTCGTATAACCGGTGAACGGTTGAGTATGGCCATCGACTTCAAGGTATGGGTCGGTATCATAGAAGCTTTCAGTAAGTACGGTTTAAAAACCAACAGCATTAAGCTTACTTTTCATGAGTTTGCTGGAATGTGCCGCTTTGAGTCTAAGAGATTCGATTCCCGTCTTAGAAAAAGT…	ATTAAGTTGTTAAGTTAACAACTTAATATTGCCAAACAGGCGACAATATTGCAATGCCTTTATTAAGTTAATATCTTGTTAAGTTGTTAACCACATGATTTATAACTGAATT
纳入分析		pEh1A		KR822246	Enterobacter hormaechei	GTGGCTTCTCGCCGCCGCCGCCGGTTCCTGAACCGGTGGATCAAGTCACTTGCCACCCCTGCGGGCCGTCAGAAAATCAAAGCAGAACTGCGTCGCCGTATCCGGCACAACAGATACTGGGTTAACGAAGCCAACAAATTTGGGCTTGAGACACTTTGCGAGCTGATGCTGGCCATTCTCGACGATGTTGATTTACGAGACTGGCAGACCCGGCACAACCTTGAAACACTGGCTGAACGTGCAGGTCTGGCAACGCGCAGTGATGGCGGTCATAAGTCGATTTCTCGGGCTAGCCGGGGATGTGATCGCTTGTACTGGCTTAATGCCATCATCACAGACAAAGCCCCCTTCAATCCTTATGATGCCCGTTGCGCCTGTAAGCACATAGAGGTGACTGAG…	GACAAACATAAAAACAT	GAATAACTTAAAAACAT	CAAGCAGAGAACCACAT		ATGAATGAGAATGTTTATATCGGCGAGGTTATAGGTCCAGATTGTGAAAGTGTTAACAATAAACTCACCGTCACAAGTAAGGCCACAGTTCAGCCTGTAGCCCTGATGAGATTAAATGTTTTTGTTCCTTCAAGCAGGCCTGCAAAGGGCACCAGAACATCAATCGATGCGACCTCTGTTCTCAAGGATCTGGAATTCTCAAGGCGGGAGGGGTACGACGATATTCGTATAACCGGTGAACGGTTGAGTATGGCCATCGACTTCAAGGTATGGGTCGGTATCATAGAAGCTTTCAGTAAGTACGGTTTAAAAACCAACAGCATTAAGCTTACTTTTCATGAGTTTGCTGGAATGTGCCGCTTTGAGTCTAAGAGATTCGATTCCCGTCTTAGAAAAAGT…	ATTAAGTTGTTAAGTTAACAACTTAATATTGCCAAACAGGCGACAATATTGCAATGCCTTTATTAAGTTAATATCTTGTTAAGTTGTTAACCACATGATTTATAACTGAATT
纳入分析		pCP020050		CP020050	Escherichia coli	GTGGCTTCTCGCCGCCGCCGCCGGTTCCTGAACCGGTGGATCAAGTCACTTGCCACCCCTGCGGGCCGTCAGAAAATCAAAGCAGAACTGCGTCGCCGTATCCGGCACAACAGATACTGGGTTAACGAAGCCAACAAATTTGGGCTTGAGACACTTTGCGAGCTGATGCTGGCCATTCTCGACGATGTTGATTTACGAGACTGGCAGACCCGGCACAACCTTGAAACACTGGCTGAACGTGCAGGTCTGGCAACGCGCAGTGATGGCGGTCATAAGTCGATTTCTCGGGCTAGCCGGGGATGTGATCGCTTGTACTGGCTTAATGCCATCATCACAGACAAAGCCCCCTTCAATCCTTATGATGCCCGTTGCGCCTGTAAGCACATAGAGGTGACTGAG…	GACAAACATAAAAACAT	GAATAACTTAAAAACAT	CAAGCAGAGAACCACAT		ATGAATGAGAATGTTTATATCGGCGAGGTTATAGGTCCAGATTGTGAAAGTGTTAACAATAAACTCACCGTCACAAGTAAGGCCACAGTTCAGCCTGTAGCCCTGATGAGATTAAATGTTTTTGTTCCTTCAAGCAGGCCTGCAAAGGGCACCAGAACATCAATCGATGCGACCTCTGTTCTCAAGGATCTGGAATTCTCAAGGCGGGAGGGGTACGACGATATTCGTATAACCGGTGAACGGTTGAGTATGGCCATCGACTTCAAGGTATGGGTCGGTATCATAGAAGCTTTCAGTAAGTACGGTTTAAAAACCAACAGCATTAAGCTTACTTTTCATGAGTTTGCTGGAATGTGCCGCTTTGAGTCTAAGAGATTCGATTCCCGTCTTAGAAAAAGT…	ATTAAGTTGTTAAGTTAACAACTTAATATTGCCAAACAGGCGACAATATTGCAATGCCTTTATTAAGTTAATATCTTGTTAAGTTGTTAACCACATGATTTATAACTGAATT
纳入分析		pLN824135		LN824135	Klebsiella pneumoniae	GTGGCTTCTCGCCGCCGCCGCCGGTTCCTGAACCGGTGGATCAAGTCACTTGCCACCCCTGCGGGCCGTCAGAAAATCAAAGCAGAACTGCGTCGCCGTATCCGGCACAACAGATACTGGGTTAACGAAGCCAACAAATTTGGGCTTGAGACACTTTGCGAGCTGATGCTGGCCATTCTCGACGATGTTGATTTACGAGACTGGCAGACCCGGCACAACCTTGAAACACTGGCTGAACGTGCAGGTCTGGCAACGCGCAGTGATGGCGGTCATAAGTCGATTTCTCGGGCTAGCCGGGGATGTGATCGCTTGTACTGGCTTAATGCCATCATCACAGACAAAGCCCCCTTCAATCCTTATGATGCCCGTTGCGCCTGTAAGCACATAGAGGTGACTGAG…	GACAAACATAAAAACAT	GAATAACTTAAAAACAT	CAAGCAGAGAACCACAT		ATGAATGAGAATGTTTATATCGGCGAGGTTATAGGTCCAGATTGTGAAAGTGTTAACAATAAACTCACCGTCACAAGTAAGGCCACAGTTCAGCCTGTAGCCCTGATGAGATTAAATGTTTTTGTTCCTTCAAGCAGGCCTGCAAAGGGCACCAGAACATCAATCGATGCGACCTCTGTTCTCAAGGATCTGGAATTCTCAAGGCGGGAGGGGTACGACGATATTCGTATAACCGGTGAACGGTTGAGTATGGCCATCGACTTCAAGGTATGGGTCGGTATCATAGAAGCTTTCAGTAAGTACGGTTTAAAAACCAACAGCATTAAGCTTACTTTTCATGAGTTTGCTGGAATGTGCCGCTTTGAGTCTAAGAGATTCGATTCCCGTCTTAGAAAAAGT…	ATTAAGTTGTTAAGTTAACAACTTAATATTGCCAAACAGGCGACAATATTGCAATGCCTTTATTAAGTTAATATCTTGTTAAGTTGTTAACCACATGATTTATAACTGAATT
纳入分析		pCAV1217-71		CP018674	Klebsiella pneumoniae	GTGGCTTCTCGCCGCCGCCGCCGGTTCCTGAACCGGTGGATCAAGTCACTTGCCACCCCTGCGGGCCGTCAGAAAATCAAAGCAGAACTGCGTCGCCGTATCCGGCACAACAGATACTGGGTTAACGAAGCCAACAAATTTGGGCTTGAGACACTTTGCGAGCTGATGCTGGCCATTCTCGACGATGTTGATTTACGAGACTGGCAGACCCGGCACAACCTTGAAACACTGGCTGAACGTGCAGGTCTGGCAACGCGCAGTGATGGCGGTCATAAGTCGATTTCTCGGGCTAGCCGGGGATGTGATCGCTTGTACTGGCTTAATGCCATCATCACAGACAAAGCCCCCTTCAATCCTTATGATGCCCGTTGCGCCTGTAAGCACATAGAGGTGACTGAG…	GACAAACATAAAAACAT	GAATAACTTAAAAACAT	CAAGCAGAGAACCACAT		ATGAATGAGAATGTTTATATCGGCGAGGTTATAGGTCCAGATTGTGAAAGTGTTAACAATAAACTCACCGTCACAAGTAAGGCCACAGTTCAGCCTGTAGCCCTGATGAGATTAAATGTTTTTGTTCCTTCAAGCAGGCCTGCAAAGGGCACCAGAACATCAATCGATGCGACCTCTGTTCTCAAGGATCTGGAATTCTCAAGGCGGGAGGGGTACGACGATATTCGTATAACCGGTGAACGGTTGAGTATGGCCATCGACTTCAAGGTATGGGTCGGTATCATAGAAGCTTTCAGTAAGTACGGTTTAAAAACCAACAGCATTAAGCTTACTTTTCATGAGTTTGCTGGAATGTGCCGCTTTGAGTCTAAGAGATTCGATTCCCGTCTTAGAAAAAGT…	ATTAAGTTGTTAAGTTAACAACTTAATATTGCCAAACAGGCGACAATATTGCAATGCCTTTATTAAGTTAATATCTTGTTAAGTTGTTAACTACATGATTTATAACTGAATT
	IncFIIpKF727591β	pKp_Goe_414-4	IncFIIpKF727591β reference	CP018341	Klebsiella pneumoniae	GTGGCTTCGCGCCGCCGCCGCCGGTTCCTGAACCGGTTGATCCGGTCACTGGCCACGCCTGCGGGGCGTCTGAAAATCACAGCAGAACTGCGCCGCCGCATCCGGTATAACAAGTATTGGGTCAATGAGGCAAACCGGTTCGGACTGGAAACGCTGTGTGAACTGTTGCTGGCCATCCTTGACGATCTTGATTTTAGAGACTGGCAAACCAGACACAACCTGGAAACGCTGGCCGAACGTGCCGGCTTGGCCACGCGCAGTCAATCCGGCCATGTGTCGATCTCCCGTGCCAGCCGGGGCTGTGACCGCTTGGTCTGGCTCAACGCTATCATTACAGAAAAAGCCCCCTTCAATCCTTATGACGCCCGCTGTGCCTGTAAGCACATCGAGGTCACAGAA…	TCAATACGATCTTGAATGCG	TGAGAAATCATATATATGCG	TCATATATTGCATATATGCG
		p205880-qnrS		MF190368	Klebsiella pneumoniae	GTGGCTTCGCGCCGCCGCCGCCGGTTCCTGAACCGGTTGATCCGGTCACTGGCCACGCCTGCGGGGCGTCTGAAAATCACAGCAGAACTGCGCCGCCGCATCCGGTATAACAAGTATTGGGTCAATGAGGCAAACCGGTTCGGACTGGAAACGCTGTGTGAACTGTTGCTGGCCATCCTTGACGATCTTGATTTTAGAGACTGGCAAACCAGACACAACCTGGAAACGCTGGCCGAACGTGCCGGCTTGGCCACGCGCAGTCAATCCGGCCATGTGTCGATCTCCCGTGCCAGCCGGGGCTGTGACCGCTTGGTCTGGCTCAACGCTATCATTACAGAAAAAGCCCCCTTCAATCCTTATGACGCCCGCTGTGCCTGTAAGCACATCGAGGTCACAGAA…	TCAATACGATCTTGAATGCG	TGAGAAATCATATATATGCG	TCATATATTGCATATATGCG
		p675920-2		MF133496	Klebsiella pneumoniae	GTGGCTTCGCGCCGCCGCCGCCGGTTCCTGAACCGGTTGATCCGGTCACTGGCCACGCCTGCGGGGCGTCTGAAAATCACAGCAGAACTGCGCCGCCGCATCCGGTATAACAAGTATTGGGTCAATGAGGCAAACCGGTTCGGACTGGAAACGCTGTGTGAACTGTTGCTGGCCATCCTTGACGATCTTGATTTTAGAGACTGGCAAACCAGACACAACCTGGAAACGCTGGCCGAACGTGCCGGCTTGGCCACGCGCAGTCAATCCGGCCATGTGTCGATCTCCCGTGCCAGCCGGGGCTGTGACCGCTTGGTCTGGCTCAACGCTATCATTACAGAAAAAGCCCCCTTCAATCCTTATGACGCCCGCTGTGCCTGTAAGCACATCGAGGTCACAGAA…	TCAATACGATCTTGAATGCG	TGAGAAATCATATATATGCG	TCATATATTGCATATATGCG
	IncpKPHS1	pKPHS1	IncpKPHS1 reference	CP003223	Klebsiella pneumoniae	ATGCTGTCAGCGGTAAACGATATGCTGTCAGCGGTACGGTATATGCTGCCAACGGTTTTGTGTATGCTATCAGCGGTAATTGACGTATGCTGTCAGCGGTTAGAACCAAAAGGTATCCACATGTCCACAAAAAATAAAAAAGAGAGTGAAATCAAAGAAATACCTGAGGATAACGAAATTCTTGAGGAAGATGCTCTCAATTTGTACACAGGTGACTTAGTTCCTAACAGCAACAATACGGTGCAGCCAATCGCTTTAATGCGCCTTGGCCTCTTTGTTCCAACGCTCAAGGGAACGAAGAATAGCTCTCGCAACAAGTCCAACATGATCGACGCATCCAGGGAGCTTGTCCAGCTTGAAGTCGCGCGGTCAGAGGGTTATTCAAACATTAAAATCACC…	AATGTATGCTGTCAGCGGTAA	AAAGTATGCTGTCAGCGGTAC	AAGATATGCTGTCAGCGGTAA	AACGTATGCTGTGAACGGTAC
		pRJA166c		CP019050	Klebsiella pneumoniae	ATGCTGTCAGCGGTAAACGATATGCTGTCAGCGGTACGGTATATGCTGCCAACGGTTTTGTGTATGCTATCAGCGGTAATTGACGTATGCTGTCAGCGGTTAGAACCAAAAGGTATCCACATGTCCACAAGAAAGAAAAAAGAGAGCGATATCAAAGAAATACCTGAAGACAACGAAATTCCTGAGGAAGAAGCTCTCACTTTGTACACAGGTGATTTAGTTCCTAACAGCAACAACACGGTGCAGCCAATCGCTTTAATGCGTCTTGGCCTCTTCGTGCCGACACTCAAAGGAACGAAGAATAGCTCTCGCAACAAGTCCAACATGATCGACGCATCCAGAGAGCTTGTCCAGCTGGAAGTCGCGCGGTCAGAGGGTTATTCAAACATTAAAATCACC…	AATGTATGCTGTCAGCGGTAA	AACGTATGCTGTCAGCGGTAC	AAGATATGCTGTCAGCGGTAA	AACGTATGCTGTGAACGGTAC
		pPMK1-B		CP008931	Klebsiella pneumoniae	ATGCTGTCAGCGGTAAACGATATGCTGTCAGCGGTACGGTATATGCTGCCAACGGTTTTGTGTATGCTATCAGCGGTAATTGACGTATGCTGTCAGCGGTTAGAACCAAAAGGTATCCACATGTCCACAAAAAATAAAAAAGAGAGTGAAATCAAAGAAATACCTGAAGATAACGAAATTCTTGAGGAAGATGCTCTCAATTTGTACACAGGTGACTTAGTTCCTAACAGCAACAATACGGTGCAGCCAATCGCTTTAATGCGCCTTGGCCTCTTTGTTCCAACGCTCAAGGGAACGAAGAATAGCTCTCGCAACAAGTCCAACATGATCGACGCATCCAGGGAGCTTGTCCAGCTTGAAGTCGCGCGGTCAGAGGGTTATTCAAACATTAAAATCACC…	AATGTATGCTGTCAGCGGTAA	AAAGTATGCTGTCAGCGGTAC	AAGATATGCTGTCAGCGGTAA	AACGTATGCTGTGAGCGGTAC
		pSg1-1		CP012427	Klebsiella pneumoniae	ATGCTGTCAGCGGTAAACGATATGCTGTCAGCGGTACGGTATATGCTGCCAACGGTTTTGTGTATGCTATCAGCGGTAATTGACGTATGCTGTCAGCGGTTAGAACCAAAAGGTATCCACATGTCCACAAAAAAGAAAAAAGAGAGTGAAATCAAAGAAATACCTGAAGATAACGAAATTCTTGAGGAAGATGCTCTCAATTTGTACACAGGTGACTTAGTTCCTAACAGCAACAACACGGTGCAGCCAATCGCTTTAATGCGCCTTGGCCTCTTTGTTCCAACGCTCAAGGGAACGAAGAATAGCTCTCGCAACAAGTCCAACATGATCGACGCATCCAGGGAGCTTGTCCAGCTGGAAGTCGCGCGGTCAGAGGGTTATTCAAACATTAAAATCACC…	AATGTATGCTGTCAGCGGTAA	AACGTATGCTGTCAGCGGTAC	AATGTATGCTGTCAGCGGTAA	AACGTATGCTGTGAACGGTAC
		p11219-CTXM		MF133442	Klebsiella pneumoniae	ATGCTGTCAGCGGTAAACGATATGCTGTCAGCGGTACGGTATATGCTGCCAACGGTTTTGTGTATGCTATCAGCGGTAATTGACGTATGCTGTCAGCGGTTAGAACCAAAAGGTATCCACATGTCCACAAGAAAGAAAATAGAGAGCGATATCAAAGAAATACCTGAAGACAACGAAATTCCTGAGGAAGAAGCTCTCACTTTGTACACAGGTGATTTAGTTCCTAACAGCAACAACACGGTGCAGCCAATCGCTTTAATGCGTCTTGGCCTCTTCGTGCCGACACTCAAAGGAACGAAGAATAGCTCTCGCAACAAGTCCAACATGATCGACGCATCCAGAGAGCTTGTCCAGCTGGAAGTCGCGCGGTCAGAGGGTTATTCAAACATTAAAATCACC…	AATGTATGCTGTCAGCGGTAA	AACGTATGCTGTCAGCGGTAC	AAGATATGCTGTCAGCGGTAA	AACGTATGCTGTGAACGGCAC
		pCP020063		CP020063	Klebsiella pneumoniae	ATGCTGTCAGCGGTAAACGATATGCTGTCAGCGGTACGGTATATGCTGCCAACGGTTTTGTGTATGCTATCAGCGGTAATTGACGTATGCTGTCAGCGGTTAGAACCAAAAGGTATCCACATGTCCACAAGAAAGAAAAAAGAGAGCGATATCAAAGAAATACCTGAAGACAACGAAATTCCTGAGGAAGAAGCTCTCACTTTGTACACAGGTGATTTAGTTCCTAACAGCAACAACACGGTGCAGCCAATCGCTTTAATGCGTCTTGGCCTCTTCGTGCCGACACTCAAAGGAACGAAGAATAGCTCTCGCAACAAGTCCAACATGATCGACGCATCCAGAGAGCTTGTCCAGCTGGAAGTCGCGCGGTCAGAGGGTTATTCAAACATTAAAATCACC…	AATGTATGCTGTCAGCGGTAA	AACGTATGCTGTCAGCGGTAC	AAGATATGCTGTCAGCGGTAA	AACGTATGCTGTGAGCGGTAC
		pCP015755		CP015755	Klebsiella pneumoniae	ATGCTGTCAGCGGTAAAAGATATGCTGTCAGCGGTACGGTATATGCTGCCAACGGTTTTGTGTATGCTATCAGCGGTAATTGACGTATGCTGTCAGCGGTTAGAACCAAAAGGTATCCACATGTCCACAAAAAAGAAAAAAGAGAGTGAAATCAAAGAAATACCTGAAGATAACGAAATTCTTGAGGAAGATGCTCTCAATTTGTACACAGGTGACTTAGTTCCTAACAGCAACAACACGGTGCAGCCAATCGCTTTAATGCGTCTTGGCCTCTTCGTGCCGACACTCAAAGGAACGAAGAATAGCTCTCGCAACAAGTCCAACATGATCGACGCATCCAGAGAGCTTGTCCAGCTGGAAGTCGCGCGGTCAGAGGGTTATTCAAACATTAAAATCACC…	AATGTATGCTGTCAGCGGTAA	AACGTATGCTGTCAGCGGTAC	AAGATATGCTGTCAGCGGTAA	AACGTATGCTGTGAACGGCAC
		pCP016161		CP016161	Klebsiella pneumoniae	ATGCTGTCAGCGGTAAAAGATATGCTGTCAGCGGTACGGTATATGCTGCCAACGGTTTTGTGTATGCTATCAGCGGTAATTGACGTATGCTGTCAGCGGTTAGAACCAAAAGGTATCCACATGTCCACAAAAAAGAAAAAAGAGAGTGAAATCAAAGAAATACCTGAAGATAACGAAATTCTTGAGGAAGATGCTCTCAATTTGTACACAGGTGACTTAGTTCCTAACAGCAACAACACGGTGCAGCCAATCGCTTTAATGCGTCTTGGCCTCTTCGTGCCGACACTCAAAGGAACGAAGAATAGCTCTCGCAACAAGTCCAACATGATCGACGCATCCAGAGAGCTTGTCCAGCTGGAAGTCGCGCGGTCAGAGGGTTATTCAAACATTAAAATCACC…	AATGTATGCTGTCAGCGGTAA	AACGTATGCTGTCAGCGGTAC	AAGATATGCTGTCAGCGGTAA	AACGTATGCTGTGAACGGCAC
		pUCLAOXA232-4		CP012565	Klebsiella pneumoniae	ATGCTGTCAGCGGTAAACGATATGCTGTCAGCGGTACGGTATATGCTGCCAACGGTTTTGTGTATGCTATCAGCGGTAATTGACGTATGCTGTCAGCGGTTAGAACCAAAAGGTATCCACATGTCCACAAAAAATAAAAAAGAGAGTGAAATCAAAGAAATACCTGAAGATAACGAAATTCTTGAGGAAGATGCTCTCAATTTGTACACAGGTGACTTAGTTCCTAACAGCAACAATACGGTGCAGCCAATCGCTTTAATGCGCCTTGGCCTCTTTGTTCCAACGCTCAAGGGAACGAAGAATAGCTCTCGCAACAAGTCCAACATGATCGACGCATCCAGGGAGCTTGTCCAGCTTGAAGTCGCGCGGTCAGAGGGTTATTCAAACATTAAAATCACC…	AATGTATGCTGTCAGCGGTAA	AAAGTATGCTGTCAGCGGTAC	AAGATATGCTGTCAGCGGTAA	AACGTATGCTGTGAACGGTAC
		pUCLAOXA232-4.X		CP012570	Klebsiella pneumoniae	ATGCTGTCAGCGGTAAACGATATGCTGTCAGCGGTACGGTATATGCTGCCAACGGTTTTGTGTATGCTATCAGCGGTAATTGACGTATGCTGTCAGCGGTTAGAACCAAAAGGTATCCACATGTCCACAAAAAATAAAAAAGAGAGTGAAATCAAAGAAATACCTGAAGATAACGAAATTCTTGAGGAAGATGCTCTCAATTTGTACACAGGTGACTTAGTTCCTAACAGCAACAATACGGTGCAGCCAATCGCTTTAATGCGCCTTGGCCTCTTTGTTCCAACGCTCAAGGGAACGAAGAATAGCTCTCGCAACAAGTCCAACATGATCGACGCATCCAGGGAGCTTGTCCAGCTTGAAGTCGCGCGGTCAGAGGGTTATTCAAACATTAAAATCACC…	AATGTATGCTGTCAGCGGTAA	AAAGTATGCTGTCAGCGGTAC	AAGATATGCTGTCAGCGGTAA	AACGTATGCTGTGAACGGTAC
		pIncFIB_DHQP1400954		CP016924	Klebsiella pneumoniae	ATGCTGTCAGCGGTAAACGATATGCTGTCAGCGGTACGGTATATGCTGCCAACGGTTTTGTGTATGCTATCAGCGGTAATTGACGTATGCTGTCAGCGGTTAGAACCAAAAGGTATCCACATGTCCACAAAAAATAAAAAAGAGAGTGAAATCAAAGAAATACCTGAAGATAACGAAATTCTTGAGGAAGATGCTCTCAATTTGTACACAGGTGACTTAGTTCCTAACAGCAACAATACGGTGCAGCCAATCGCTTTAATGCGCCTTGGCCTCTTTGTTCCAACGCTCAAGGGAACGAAGAATAGCTCTCGCAACAAGTCCAACATGATCGACGCATCCAGGGAGCTTGTCCAGCTTGAAGTCGCGCGGTCAGAGGGTTATTCAAACATTAAAATCACC…	AATGTATGCTGTCAGCGGTAA	AAAGTATGCTGTCAGCGGTAC	AAGATATGCTGTCAGCGGTAA	AACGTATGCTGTGAACGGTAC
		pKPN-04f		CP014756	Klebsiella pneumoniae	ATGCTGTCAGCGGTAAACGATATGCTGTCAGCGGTACGGTATATGCTGCCAACGGTTTTGTGTATGCTATCAGCGGTAATTGACGTATGCTGTCAGCGGTTAGAACCAAAAGGTATCCACATGTCCACAAGAAAGAAAAAAGAGAGCGATATCAAAGAAATACCTGAAGACAACGAAATTCCTGAGGAAGAAGCTCTCACTTTGTACACAGGTGATTTAGTTCCTAACAGCAACAACACGGTGCAGCCAATCGCTTTAATGCGTCTTGGCCTCTTCGTGCCGACACTCAAAGGAACGAAGAATAGCTCTCGCAACAAGTCCAACATGATCGACGCATCCAGAGAGCTTGTCCAGCTGGAAGTCGCGCGGTCAGAGGGTTATTCAAACATTAAAATCACC…	AATGTATGCTGTCAGCGGTAA	AACGTATGCTGTCAGCGGTAC	AAGATATGCTGTCAGCGGTAA	AACGTATGCTGTGAACGGTAC
		p205880-NR1		MF144193	Klebsiella pneumoniae	ATGCTGTCAGCGGTAAACGATATGCTGTCAGCGGTACGGTATATGCTGCCAACGGTTTTGTGTATGCTATCAGCGGTAATTGACGTATGCTGTCAGCGGTTAGAACCAAAAGGTATCCACATGTCCACAAGAAAGAAAAAAGAGAGCGATATCAAAGAAATACCTGAAGACAACGAAATTCCTGAGGAAGAAGCTCTCACTTTGTACACAGGTGATTTAGTTCCTAACAGCAACAACACGGTGCAGCCAATCGCTTTAATGCGTCTTGGCCTCTTCGTGCCGACACTCAAAGGAACGAAGAATAGCTCTCGCAACAAGTCCAACATGATCGACGCATCCAGAGAGCTTGTCCAGCTGGAAGTCGCGCGGTCAGAGGGTTATTCAAACATTAAAATCACC…	AATGTATGCTGTCAGCGGTAA	AACGTATGCTGTCAGCGGTAC	AATGTATGCTGTCAGCGGTAA	AACGTATGCTGTGAGCGGTAC
		pKP301b		KY354306	Klebsiella pneumoniae	ATGCTGTCAGCGGTAAACGATATGCTGTCAGCGGTACGGTATATGCTGCCAACGGTTTTGTGTATGCTATCAGCGGTAATTGACGTATGCTGTCAGCGGTTAGAACCAAAAGGTATCCACATGTCCACAAAAAAGAAAAAAGAGAGTGAAATCAAAGAAATACCTGAAGATAACGAAATTCTTGAGGAAGATGCTCTCAATTTGTACACAGGTGACTTAGTTCCTAACAGCAACAACACGGTGCAGCCAATCGCTTTAATGCGTCTTGGCCTCTTCGTGCCGACACTCAAAGGAACGAAGAATAGCTCTCGCAACAAGTCCAACATGATCGACGCATCCAGAGAGCTTGTCCAGCTGGAAGTCGCGCGGTCAGAGGGTTATTCAAACATTAAAATCACC…	AATGTATGCTGTCAGCGGTAA	AACGTATGCTGTCAGCGGTAC	AAGATATGCTGTCAGCGGTAA	AACGTATGCTGTGAACGGTAC

## Sheet: Table S2 
Table S2a. Pairwise comparison of IncFIIpKF727591 plasmids repA sequences using BLASTN
(coverage+identity)	pKF727591	pKpn235-BG	pKpn240-BG	pB-3002cz	pEh1A	pCP020050	pLN824135	pCAV1217-71	pKp_Goe_414-4	p205880-qnrS	p675920-2
pKF727591		(100%+100%)	(100%+100%)	(100%+100%)	(100%+100%)	(100%+100%)	(100%+100%)	(100%+100%)	（94%+79%）	（94%+79%）	（94%+79%）
pKpn235-BG	(100%+100%)		(100%+100%)	(100%+100%)	(100%+100%)	(100%+100%)	(100%+100%)	(100%+100%)	（94%+79%）	（94%+79%）	（94%+79%）
pKpn240-BG	(100%+100%)	(100%+100%)		(100%+100%)	(100%+100%)	(100%+100%)	(100%+100%)	(100%+100%)	（94%+79%）	（94%+79%）	（94%+79%）
pB-3002cz	(100%+100%)	(100%+100%)	(100%+100%)		(100%+100%)	(100%+100%)	(100%+100%)	(100%+100%)	（94%+79%）	（94%+79%）	（94%+79%）
pEh1A	(100%+100%)	(100%+100%)	(100%+100%)	(100%+100%)		(100%+100%)	(100%+100%)	(100%+100%)	（94%+79%）	（94%+79%）	（94%+79%）
pCP020050	(100%+100%)	(100%+100%)	(100%+100%)	(100%+100%)	(100%+100%)		(100%+100%)	(100%+100%)	（94%+79%）	（94%+79%）	（94%+79%）
pLN824135	(100%+100%)	(100%+100%)	(100%+100%)	(100%+100%)	(100%+100%)	(100%+100%)		(100%+100%)	（94%+79%）	（94%+79%）	（94%+79%）
pCAV1217-71	(100%+100%)	(100%+100%)	(100%+100%)	(100%+100%)	(100%+100%)	(100%+100%)	(100%+100%)		（94%+79%）	（94%+79%）	（94%+79%）
pKp_Goe_414-4	（94%+79%）	（94%+79%）	（94%+79%）	（94%+79%）	（94%+79%）	（94%+79%）	（94%+79%）	（94%+79%）		(100%+100%)	(100%+100%)
p205880-qnrS	（94%+79%）	（94%+79%）	（94%+79%）	（94%+79%）	（94%+79%）	（94%+79%）	（94%+79%）	（94%+79%）	(100%+100%)		(100%+100%)
p675920-2	（94%+79%）	（94%+79%）	（94%+79%）	（94%+79%）	（94%+79%）	（94%+79%）	（94%+79%）	（94%+79%）	(100%+100%)	(100%+100%)
Table S2b. Pairwise comparison of IncFIIpKF727591 plasmids backbone sequences using BLASTN
(coverage+identity)	pKF727591	pKpn235-BG	pKpn240-BG	pB-3002cz	pEh1A	pCP020050	pLN824135	pCAV1217-71	pKp_Goe_414-4	p205880-qnrS	p675920-2
pKF727591		(100%+99%)	(100%+99%)	(100%+99%)	(100%+99%)	(100%+99%)	(88%+99%)	(88%+99%)	(62%+92%)	(62%+92%)	(62%+92%)
pKpn235-BG	(99%+99%)		(99%+99%)	(99%+99%)	(99%+100%)	(99%+100%)	(88%+99%)	(88%+99%)	(62%+92%)	(62%+92%)	(62%+92%)
pKpn240-BG	(99%+99%)	(100%+99%)		(99%+99%)	(99%+99%)	(99%+99%)	(88%+99%)	(88%+99%)	(62%+92%)	(62%+92%)	(62%+92%)
pB-3002cz	(100%+99%)	(100%+99%)	(100%+99%)		(100%+99%)	(100%+99%)	(88%+99%)	(88%+99%)	(62%+92%)	(62%+92%)	(62%+92%)
pEh1A	(100%+99%)	(100%+100%)	(100%+100%)	(100%+99%)		(100%+100%)	(88%+99%)	(88%+99%)	(62%+92%)	(62%+92%)	(62%+92%)
pCP020050	(100%+99%)	(100%+100%)	(100%+100%)	(100%+99%)	(100%+100%)		(88%+99%)	(88%+99%)	(62%+92%)	(62%+92%)	(62%+92%)
pLN824135	(99%+99%)	(99%+99%)	(99%+99%)	(99%+99%)	(99%+99%)	(99%+99%)		(100%+99%)	(70%+92%)	(70%+92%)	(70%+92%)
pCAV1217-71	(99%+99%)	(99%+99%)	(99%+99%)	(99%+99%)	(99%+99%)	(99%+99%)	(100%+99%)		(70%+91%)	(70%+91%)	(70%+91%)
pKp_Goe_414-4	(60%+92%)	(60%+92%)	(60%+92%)	(60%+92%)	(60%+92%)	(60%+92%)	(60%+92%)	(60%+91%)		(99%+99%)	(99%+99%)
p205880-qnrS	(59%+92%)	(59%+92%)	(59%+92%)	(59%+92%)	(59%+92%)	(59%+92%)	(59%+92%)	(59%+91%)	(99%+99%)		(99%+99%)
p675920-2	(59%+92%)	(59%+92%)	(59%+92%)	(59%+92%)	(59%+92%)	(59%+92%)	(59%+92%)	(59%+91%)	(98%+99%)	(99%+99%)

## Sheet: Table S3
Inc group	Plasmid	Resistance locus	Resistance phenotype	Nucleotide position	Region located
IncFIIpKF727591α	pKF727591	blaNDM-1	β-lactam resistance	10629..11441	blaNDM-1 region
		bleMBL	Bleomycin resistance	11445..11810
		ars locus	Arsenic resistance	18019..22762
	pKpn235-BG	blaNDM-1	β-lactam resistance	10629..11441	blaNDM-1 region
		bleMBL	Bleomycin resistance	11445..11810
	pKpn240-BG	blaNDM-1	β-lactam resistance	10629..11441	blaNDM-1 region
		bleMBL	Bleomycin resistance	11445..11810
	pB-3002cz	blaNDM-1	β-lactam resistance	10629..11441	blaNDM-1 region
		bleMBL	Bleomycin resistance	11445..11810
		aacA4	Aminoglycoside resistance	37309..37914
	pEh1A	blaNDM-1	β-lactam resistance	10629..11441	blaNDM-1 region
		bleMBL	Bleomycin resistance	11445..11810
		ars locus	Arsenic resistance	19389..24132
	pCP020050	ars locus	Arsenic resistance	36640..41383	ars region
	pLN824135	dfrA14	Trimethoprim resistance	11882..12364	dfrA14-qnrB1 region
		qnrB1	Quinolone resistance	15647..16291
IncFIIpKF727591β	pKp_Goe_414-4	sul2	Sulphonamide resistance	9714..10529	MDR region
		catA2	Phenicol resistance	15552..16193
		tet	Tetracycline resistance	17219..19174
		blaLAP-2	β-lactam resistance	23550..24407
		qnrS1	Quinolone resistance	26004..26660
	p205880-qnrS	qnrS1	Quinolone resistance	9475..10131	Tn6396 region
	p675920-2	sul2	Sulphonamide resistance	9394..10209	MDR region
		tet	Tetracycline resistance	14950..16905
		blaLAP-2	β-lactam resistance	21281..22138
		qnrS1	Quinolone resistance	23735..24391
IncpKPHS1	pKPHS1	blaCTX-M-14	β-lactam resistance	31643..32494	Tn6558 region
	p11219-CTXM	blaCTX-M-14	β-lactam resistance	26646..27497	Tn6559 region

## Sheet: Table S4 
Table S4a. Pairwise comparison of IncpKPHS1 plasmids repA sequences using BLASTN
(coverage+identity)	pKPHS1	pRJA166c	pPMK1-B	pSg1-1	p11219-CTXM	pCP020063	pCP015755	pCP016161	pUCLAOXA232-4	pUCLAOXA232-4.X	pIncFIB_DHQP1400954	pKPN-04f	p205880-NR1	pKP301b
pKPHS1		(100%+97%)	(100%+99%)	(100%+99%)	(100%+97%)	(100%+97%)	(100%+98%)	(100%+98%)	(100%+99%)	(100%+99%)	(100%+99%)	(100%+97%)	(100%+97%)	(100%+98%)
pRJA166c	(100%+97%)		(100%+98%)	(100%+98%)	(100%+99%)	(100%+99%)	(100%+98%)	(100%+98%)	(100%+97%)	(100%+97%)	(100%+97%)	(100%+100%)	(100%+99%)	(100%+99%)
pPMK1-B	(100%+99%)	(100%+98%)		(100%+99%)	(100%+97%)	(100%+97%)	(100%+98%)	(100%+98%)	(100%+99%)	(100%+99%)	(100%+99%)	(100%+98%)	(100%+97%)	(100%+98%)
pSg1-1	(100%+99%)	(100%+98%)	(100%+99%)		(100%+98%)	(100%+98%)	(100%+98%)	(100%+98%)	(100%+99%)	(100%+99%)	(100%+99%)	(100%+98%)	(100%+98%)	(100%+98%)
p11219-CTXM	(100%+97%)	(100%+99%)	(100%+97%)	(100%+98%)		(100%+99%)	(100%+98%)	(100%+98%)	(100%+97%)	(100%+97%)	(100%+97%)	(100%+99%)	(100%+99%)	(100%+98%)
pCP020063	(100%+97%)	(100%+99%)	(100%+97%)	(100%+98%)	(100%+99%)		(100%+98%)	(100%+98%)	(100%+97%)	(100%+97%)	(100%+97%)	(100%+99%)	(100%+99%)	(100%+99%)
pCP015755	(100%+98%)	(100%+98%)	(100%+98%)	(100%+98%)	(100%+98%)	(100%+98%)		(100%+100%)	(100%+98%)	(100%+98%)	(100%+98%)	(100%+98%)	(100%+98%)	(100%+99%)
pCP016161	(100%+98%)	(100%+98%)	(100%+98%)	(100%+98%)	(100%+98%)	(100%+98%)	(100%+100%)		(100%+98%)	(100%+98%)	(100%+98%)	(100%+98%)	(100%+98%)	(100%+99%)
pUCLAOXA232-4	(100%+99%)	(100%+97%)	(100%+99%)	(100%+99%)	(100%+97%)	(100%+97%)	(100%+98%)	(100%+98%)		(100%+100%)	(100%+100%)	(100%+97%)	(100%+97%)	(100%+98%)
pUCLAOXA232-4.X	(100%+99%)	(100%+97%)	(100%+99%)	(100%+99%)	(100%+97%)	(100%+97%)	(100%+98%)	(100%+98%)	(100%+100%)		(100%+100%)	(100%+97%)	(100%+97%)	(100%+98%)
pIncFIB_DHQP1400954	(100%+99%)	(100%+97%)	(100%+99%)	(100%+99%)	(100%+97%)	(100%+97%)	(100%+98%)	(100%+98%)	(100%+100%)	(100%+100%)		(100%+97%)	(100%+97%)	(100%+98%)
pKPN-04f	(100%+97%)	(100%+100%)	(100%+98%)	(100%+98%)	(100%+99%)	(100%+99%)	(100%+98%)	(100%+98%)	(100%+97%)	(100%+97%)	(100%+97%)		(100%+99%)	(100%+99%)
p205880-NR1	(100%+97%)	(100%+99%)	(100%+97%)	(100%+98%)	(100%+99%)	(100%+99%)	(100%+98%)	(100%+98%)	(100%+97%)	(100%+97%)	(100%+97%)	(100%+99%)		(100%+99%)
pKP301b	(100%+98%)	(100%+99%)	(100%+98%)	(100%+98%)	(100%+98%)	(100%+99%)	(100%+99%)	(100%+99%)	(100%+98%)	(100%+98%)	(100%+98%)	(100%+99%)	(100%+99%)
Table S4b. Pairwise comparison of IncpKPHS1 plasmids backbone sequences using BLASTN
(coverage+identity)	pKPHS1	pRJA166c	pPMK1-B	pSg1-1	p11219-CTXM	pCP020063	pCP015755	pCP016161	pUCLAOXA232-4	pUCLAOXA232-4.X	pIncFIB_DHQP1400954	pKPN-04f	p205880-NR1	pKP301b
pKPHS1		(85%+99%)	(88%+98%)	(84%+98%)	(83%+99%)	(81%+97%)	(80%+97%)	(80%+97%)	(87%+98%)	(87%+98%)	(88%+99%)	(77%+99%)	(81%+97%)	(80%+98%)
pRJA166c	(85%+99%)		(89%+99%)	(90%+99%)	(84%+97%)	(83%+99%)	(82%+99%)	(81%+99%)	(81%+99%)	(81%+99%)	(81%+99%)	(90%+99%)	(82%+99%)	(80%+98%)
pPMK1-B	(88%+98%)	(89%+99%)		(90%+98%)	(89%+97%)	(81%+99%)	(82%+98%)	(82%+98%)	(84%+99%)	(84%+99%)	(83%+99%)	(80%+99%)	(83%+98%)	(79%+98%)
pSg1-1	(88%+98%)	(92%+99%)	(92%+98%)		(90%+98%)	(86%+99%)	(86%+99%)	(86%+99%)	(85%+98%)	(85%+98%)	(85%+98%)	(84%+99%)	(83%+99%)	(83%+98%)
p11219-CTXM	(83%+99%)	(84%+97%)	(89%+97%)	(88%+98%)		(82%+98%)	(81%+98%)	(81%+98%)	(78%+97%)	(78%+97%)	(78%+97%)	(76%+97%)	(80%+98%)	(76%+99%)
pCP020063	(86%+97%)	(83%+99%)	(84%+99%)	(86%+99%)	(84%+98%)		(90%+99%)	(92%+99%)	(85%+99%)	(85%+99%)	(85%+99%)	(80%+99%)	(91%+99%)	(87%+98%)
pCP015755	(83%+97%)	(82%+99%)	(83%+98%)	(84%+99%)	(82%+98%)	(90%+99%)		(100%+99%)	(87%+99%)	(87%+99%)	(87%+99%)	(84%+99%)	(95%+99%)	(86%+98%)
pCP016161	(83%+97%)	(82%+99%)	(83%+98%)	(84%+99%)	(82%+98%)	(90%+99%)	(100%+99%)		(88%+99%)	(88%+99%)	(88%+99%)	(84%+99%)	(94%+99%)	(86%+98%)
pUCLAOXA232-4	(89%+98%)	(81%+99%)	(84%+99%)	(82%+98%)	(78%+97%)	(85%+99%)	(87%+99%)	(87%+99%)		(100%+100%)	(99%+99%)	(86%+99%)	(90%+99%)	(84%+98%)
pUCLAOXA232-4.X	(89%+98%)	(81%+99%)	(84%+99%)	(82%+98%)	(77%+97%)	(85%+99%)	(87%+99%)	(87%+99%)	(100%+100%)		(100%+99%)	(86%+99%)	(90%+99%)	(84%+98%)
pIncFIB_DHQP1400954	(89%+99%)	(81%+99%)	(83%+99%)	(82%+98%)	(77%+97%)	(85%+99%)	(87%+99%)	(87%+99%)	(99%+99%)	(99%+99%)		(85%+99%)	(90%+99%)	(84%+98%)
pKPN-04f	(79%+99%)	(90%+99%)	(81%+99%)	(83%+99%)	(76%+97%)	(80%+99%)	(84%+99%)	(84%+99%)	(87%+99%)	(87%+99%)	(87%+99%)		(83%+99%)	(86%+98%)
p205880-NR1	(85%+97%)	(82%+99%)	(83%+98%)	(83%+99%)	(82%+98%)	(91%+99%)	(95%+99%)	(95%+99%)	(90%+99%)	(90%+99%)	(90%+99%)	(83%+99%)		(89%+98%)
pKP301b	(82%+98%)	(80%+98%)	(80%+98%)	(80%+98%)	(76%+99%)	(85%+98%)	(85%+98%)	(85%+98%)	(85%+98%)	(85%+98%)	(85%+98%)	(85%+98%)	(87%+98%)
